# Supplementary material for: Proteomic and transcriptomic studies of BGC823 cells stimulated with Helicobacter pylori isolates from gastric MALT lymphoma
Source: PubMed Central journal article supplement (PMC7485896; doi:10.1371/journal.pone.0238379), 2020-09-11

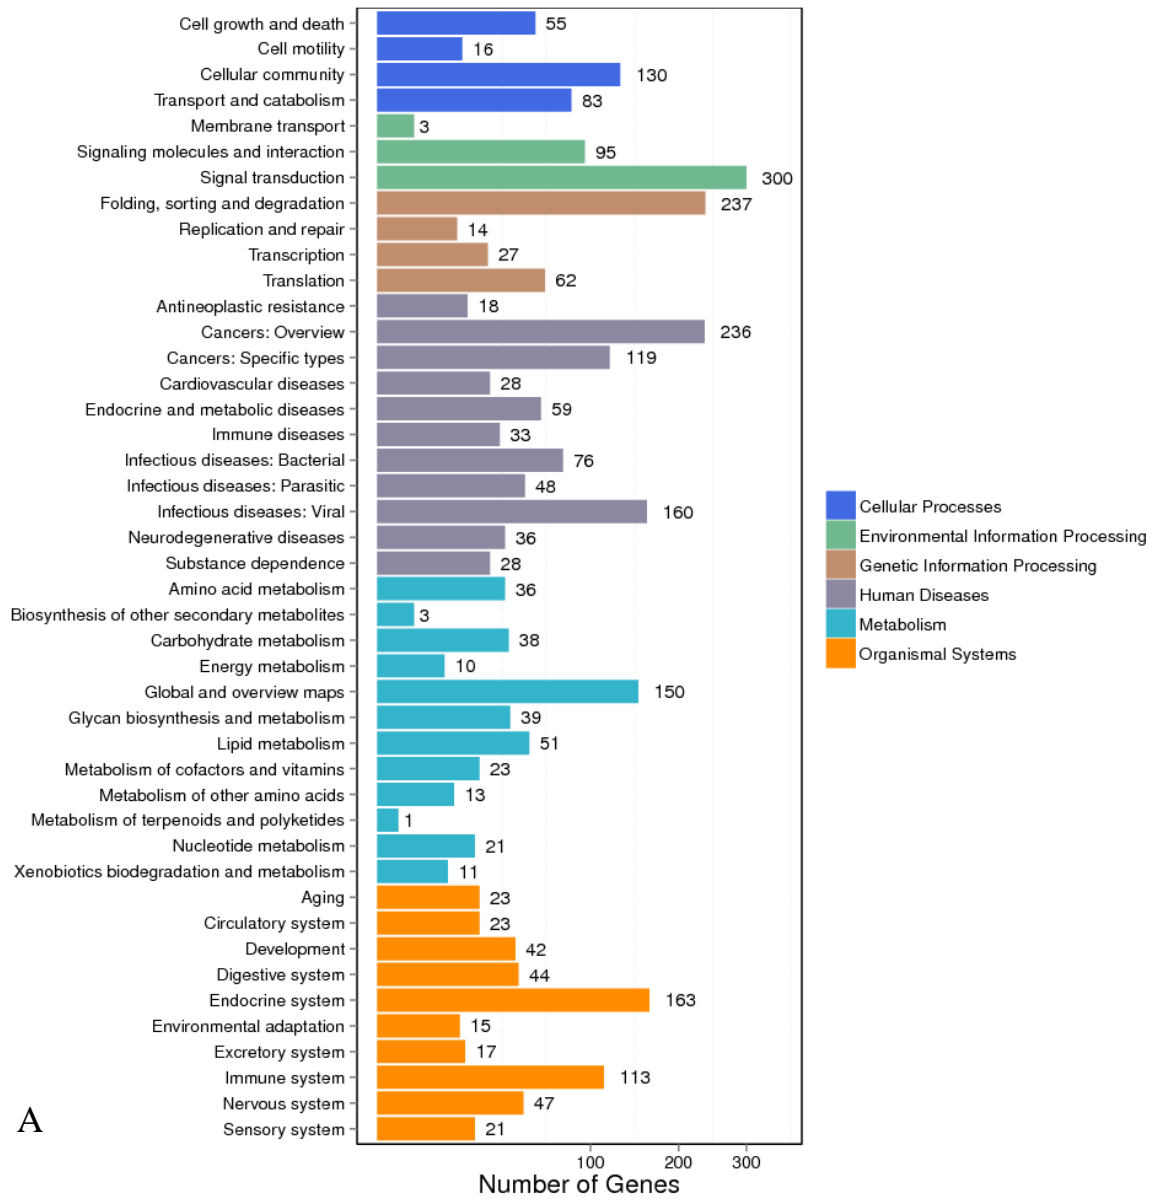

A

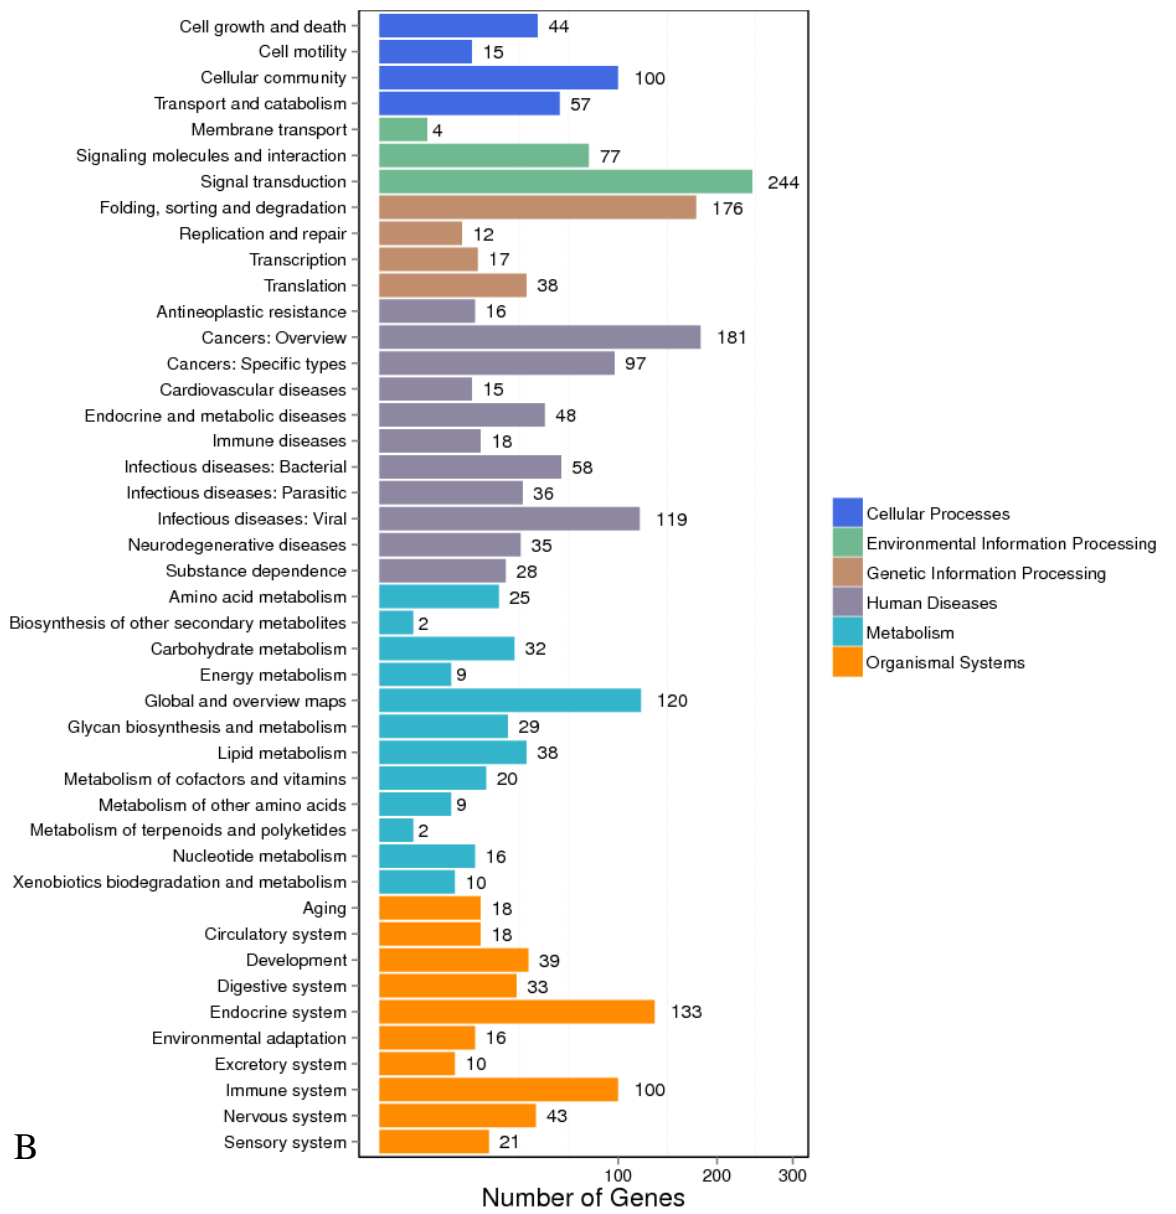

Supplement: pone.0238379.s009.pdf [file pone.0238379.s009.pdf]
